# Supplementary material for: Effect of Methionine Supplementation on Rumen Microbiota, Fermentation, and Amino Acid Metabolism in In Vitro Cultures Containing Nitrate
Source: MDPI journal article supplement (doi:10.3390/microorganisms9081717), 2021-08-12
Supplement: s1 [file s1]

## Supplementary Tables

**Table S-1. PCR primers for real-time PCR assay**

| Target strain                  | Pre/post primer | Primer sequence              | Amplification length (bp) |
|--------------------------------|-----------------|------------------------------|---------------------------|
| Total bacteria <sup>1</sup>    | F               | CGGCAACGACCGCAACCC           | 130                       |
|                                | R               | CCATTGTAGCACGTGTGTAGCC       |                           |
| Total fungi <sup>1</sup>       | F               | GAGGAAGTAAAAGTCGTAACAAGGTTTC | 120                       |
|                                | R               | CAAATTCACAAAGGGTAGGATGATT    |                           |
| Total Protozoa <sup>1</sup>    | F               | GCTTTCGWTGGTAGTGTATT         | 223                       |
|                                | R               | CTTGCCCTCYAATCGTWCT          |                           |
| Total Methanogens <sup>1</sup> | F               | TTCGGTGGATCDCARAGRGC         | 140                       |
|                                | R               | GBARGTCGAWCCGTAGAATCC        |                           |

F= forward; R= reverse.

<sup>1</sup>Ebeid et al., 2020 [24]

**Table S2. Relative abundance of different phyla across treatment groups**

| <b>Phylum</b>     | <b>Control</b> | <b>M0</b> | <b>M1</b> | <b>M2</b> | <b>P value</b> |
|-------------------|----------------|-----------|-----------|-----------|----------------|
| Bacteroidetes     | 37.52          | 44.69     | 36.11     | 38.62     | 0.100          |
| Firmicutes        | 41.76          | 31.67     | 36.62     | 37.80     | 0.019          |
| Campilobacterota  | 0.09           | 10.18     | 15.62     | 11.45     | 0.001          |
| Verrucomicrobiota | 11.17          | 2.71      | 2.88      | 2.79      | 0.001          |
| Proteobacteria    | 1.28           | 3.94      | 3.06      | 3.75      | 0.001          |
| Spirochaetota     | 2.89           | 3.68      | 2.46      | 2.40      | 0.179          |
| Actinobacteriota  | 1.17           | 0.68      | 0.85      | 0.91      | 0.179          |
| Patescibacteria   | 1.04           | 0.57      | 0.58      | 0.64      | 0.009          |
| Cyanobacteria     | 0.92           | 0.39      | 0.52      | 0.47      | 0.011          |

**Table S-3. Relative abundance of different phyla across treatment groups**

| <b>Species name</b>               | <b>Control</b> | <b>M0</b> | <b>M1</b> | <b>M2</b> | <b>P value</b> |
|-----------------------------------|----------------|-----------|-----------|-----------|----------------|
| Prevotella                        | 3.78           | 19.03     | 14.50     | 13.85     | 0.001          |
| Rikenellaceae_RC9_gut group       | 14.11          | 8.83      | 7.53      | 9.96      | 0.002          |
| Campylobacter                     | 0.02           | 10.02     | 15.48     | 11.31     | 0.001          |
| norank_f_F082                     | 10.28          | 4.45      | 4.28      | 4.90      | 0.001          |
| norank_f_UCG-011                  | 4.11           | 3.73      | 5.20      | 4.82      | 0.150          |
| norank_f_norank_o_WCHB1-41        | 7.43           | 1.98      | 2.16      | 2.07      | 0.003          |
| Succiniclasicum                   | 2.71           | 2.27      | 3.36      | 3.45      | 0.567          |
| NK4A214_group                     | 2.69           | 2.34      | 2.92      | 3.06      | 0.440          |
| Christensenellaceae_R-7_group     | 3.21           | 2.17      | 2.62      | 2.60      | 0.490          |
| norank_f_Bacteroidales_UCG-001    | 1.14           | 2.86      | 2.41      | 2.24      | 0.003          |
| norank_f_UCG-010                  | 3.73           | 1.46      | 1.46      | 1.47      | 0.001          |
| Butyrivibrio                      | 1.21           | 1.60      | 2.17      | 2.36      | 0.073          |
| norank_f_Muribaculaceae           | 1.47           | 1.76      | 1.40      | 1.48      | 0.972          |
| Sphaerochaeta                     | 1.82           | 1.68      | 1.01      | 0.84      | 0.013          |
| Treponema                         | 0.70           | 1.84      | 1.34      | 1.43      | 0.010          |
| norank_f_Bacteroidales_RF16_group | 0.81           | 1.22      | 1.51      | 1.43      | 0.005          |
| Saccharofermentans                | 1.28           | 0.95      | 1.13      | 1.23      | 0.204          |
| Ruminococcus                      | 0.98           | 0.98      | 1.29      | 1.13      | 0.538          |
| Lachnospiraceae_NK3A20_group      | 1.34           | 0.77      | 0.86      | 1.03      | 0.281          |
| Prevotellaceae_UCG-003            | 0.74           | 1.26      | 0.73      | 0.88      | 0.109          |
